# Supplementary material
Source: PubMed Central journal article supplement (PMC2585745)

# Kotliarova et al, Supp. Figure 1

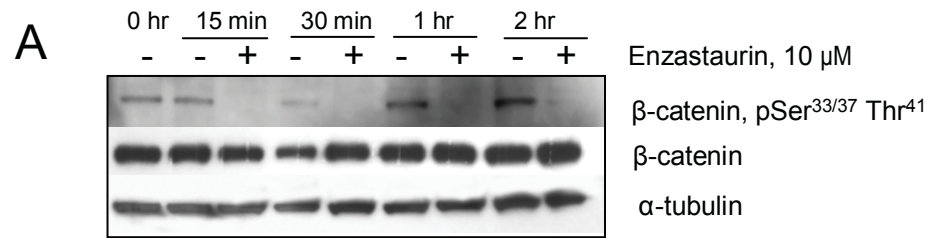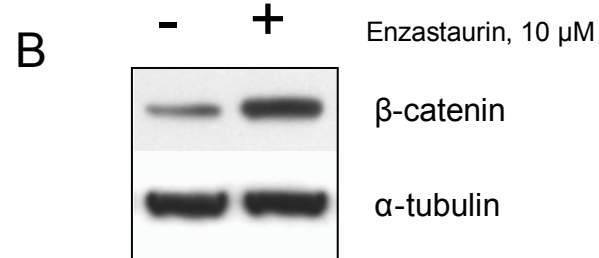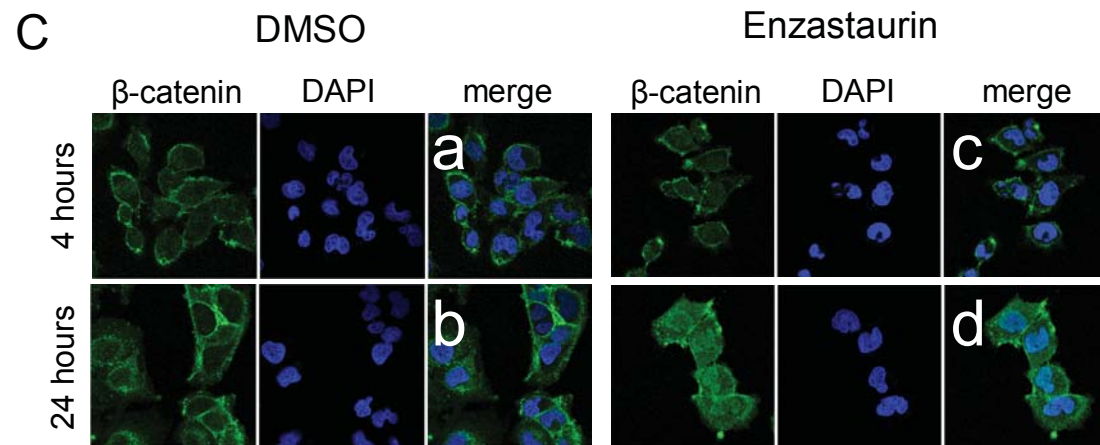

**D** TCF reporter assay in U251 treated with enzastaurin

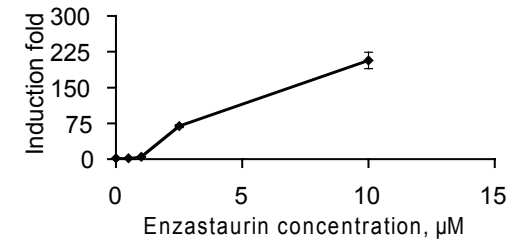

**E** Axin2 mRNA in U251 treated with enzastaurin

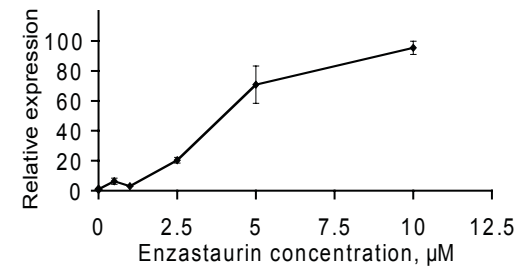

## Kotliarova et al, Supp. Figure 2

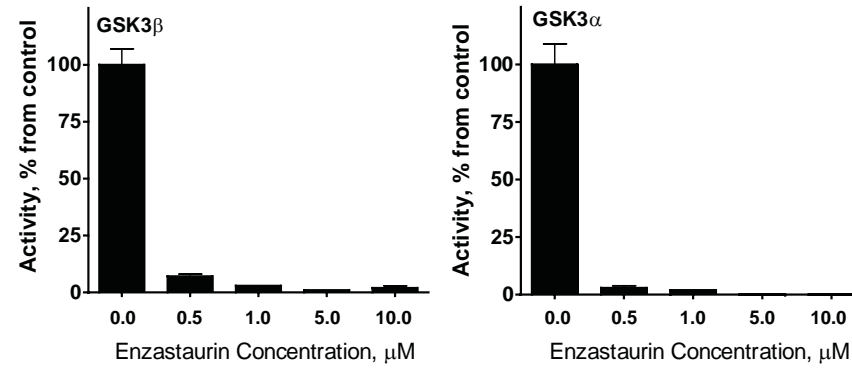

**A**

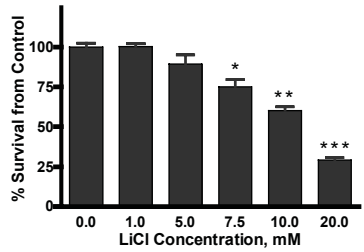

**B**

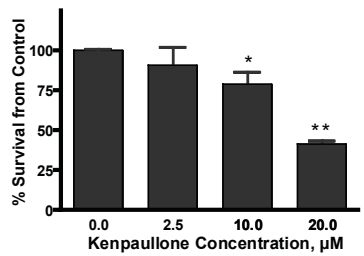

**C**

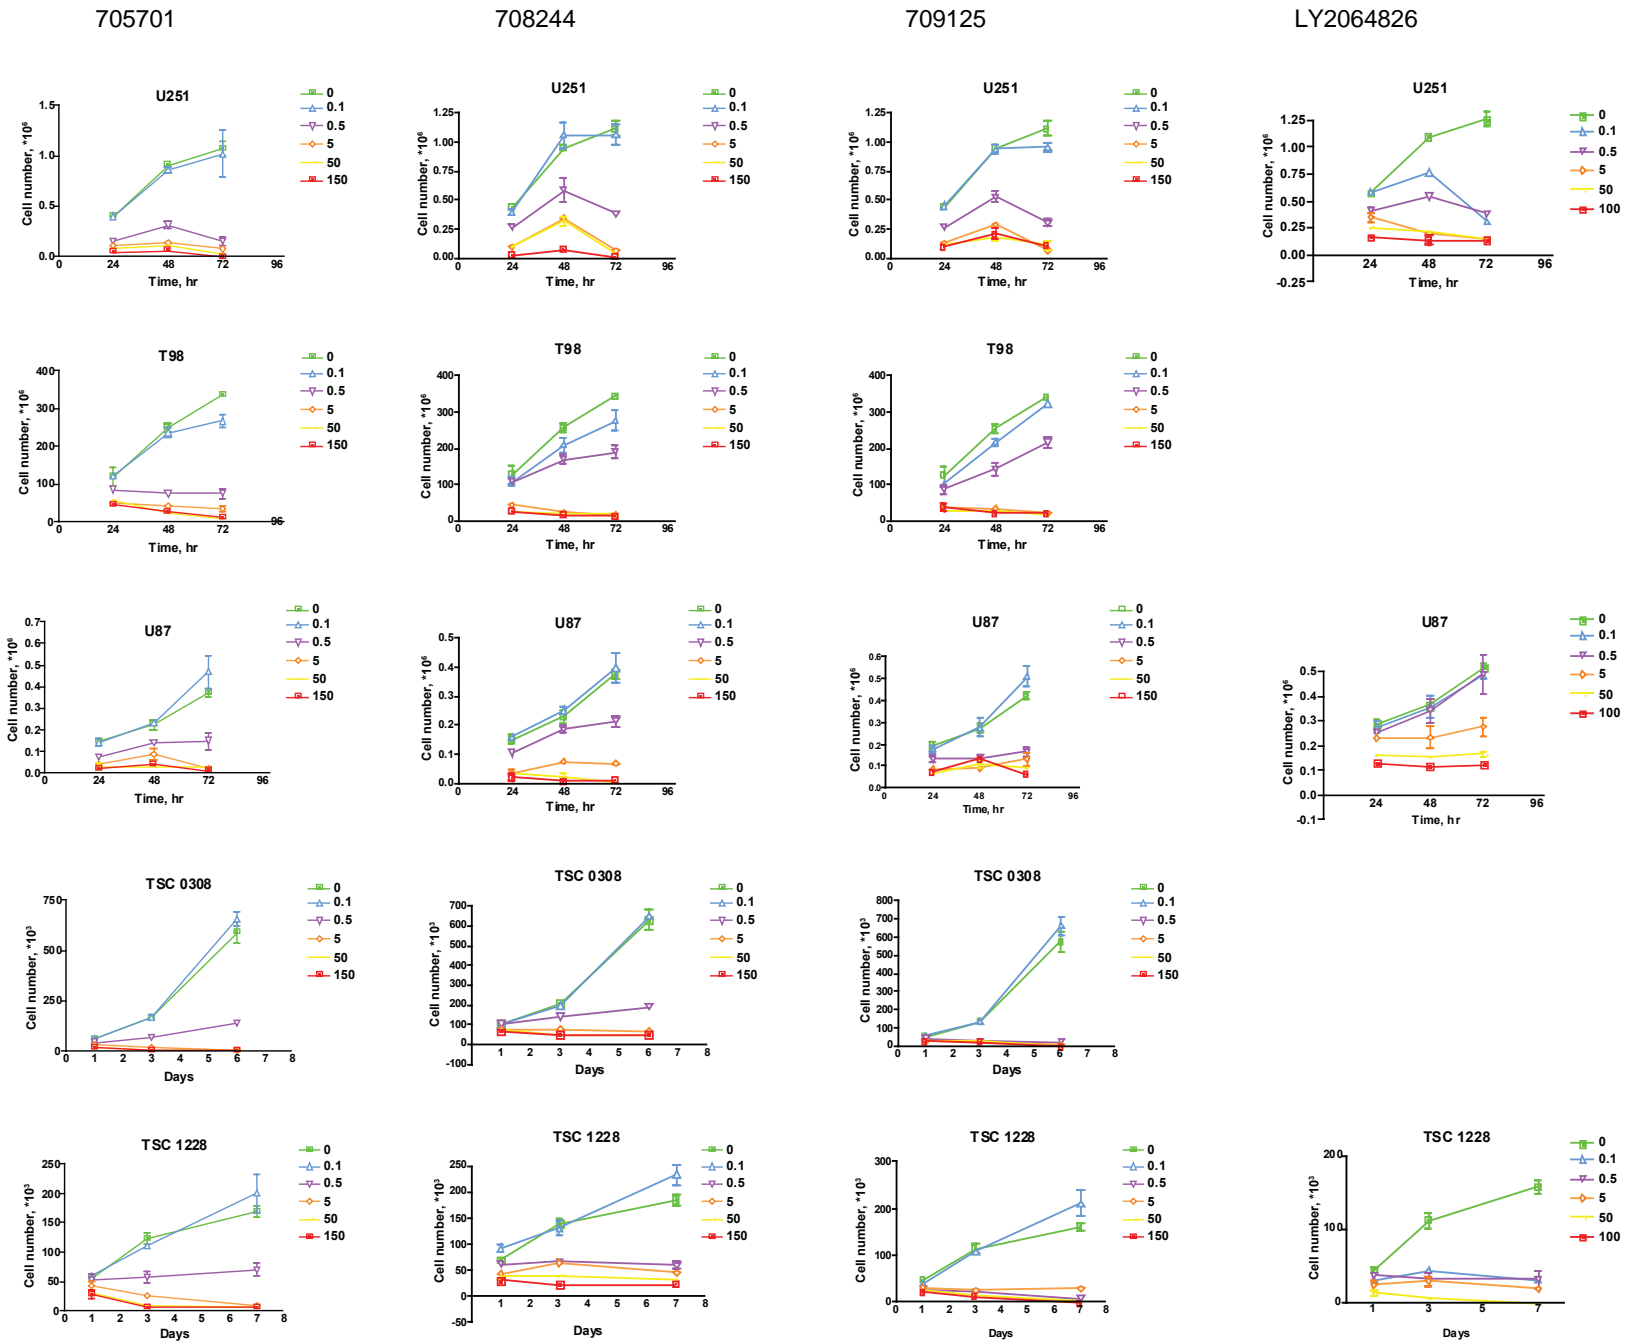

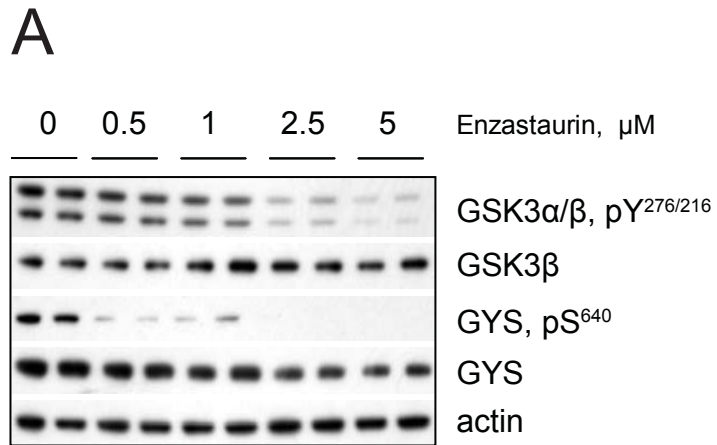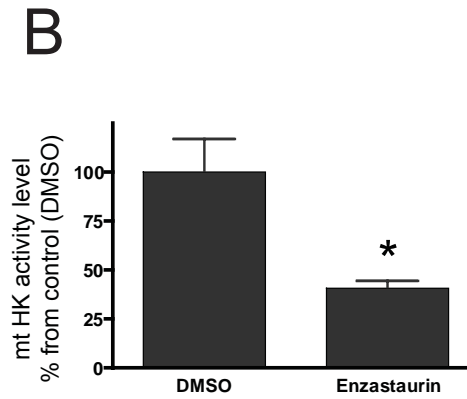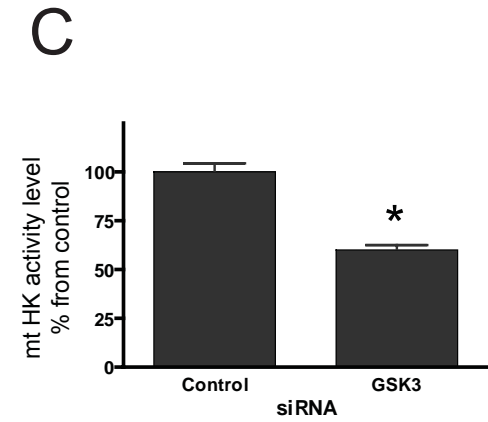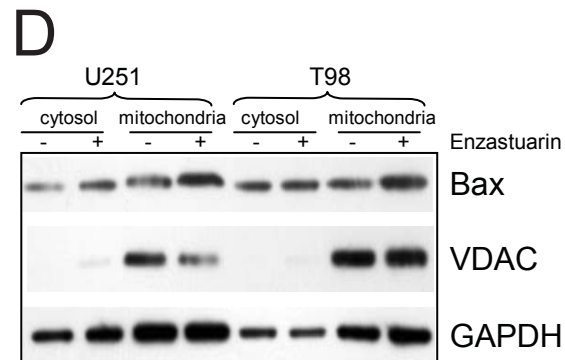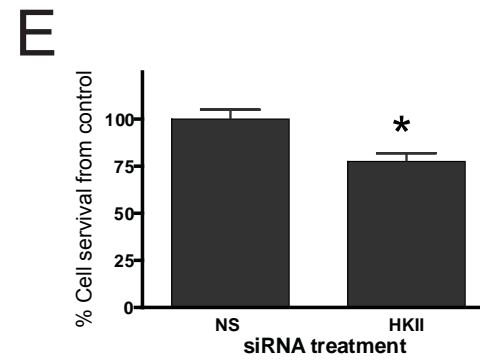

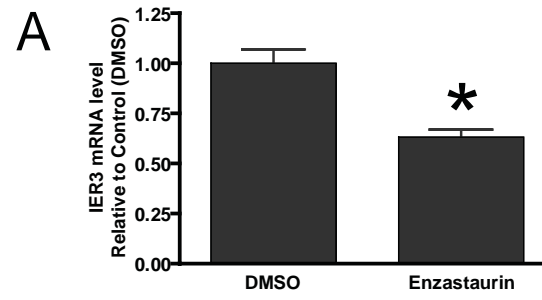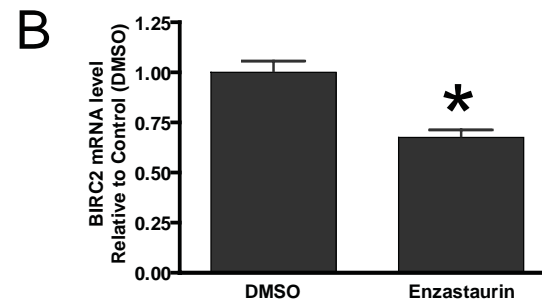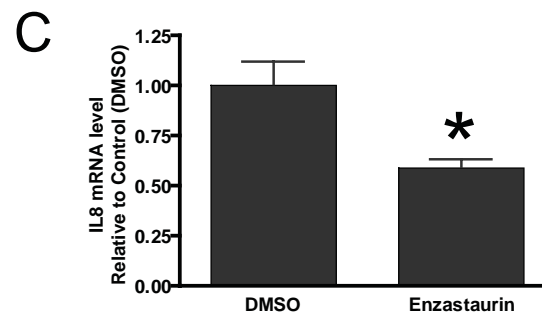

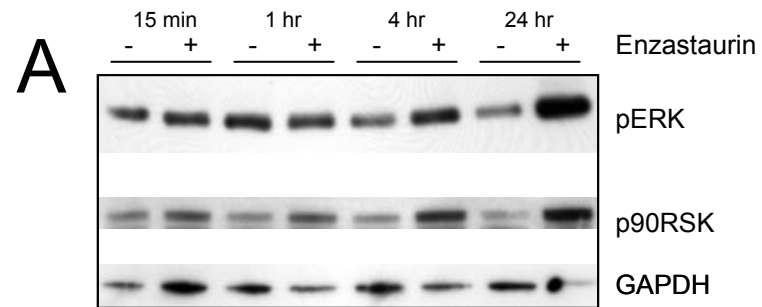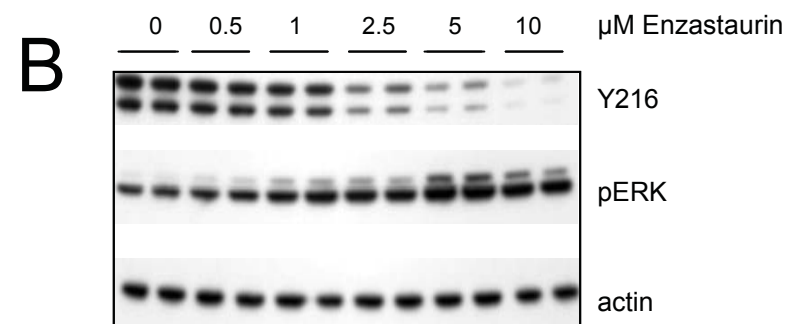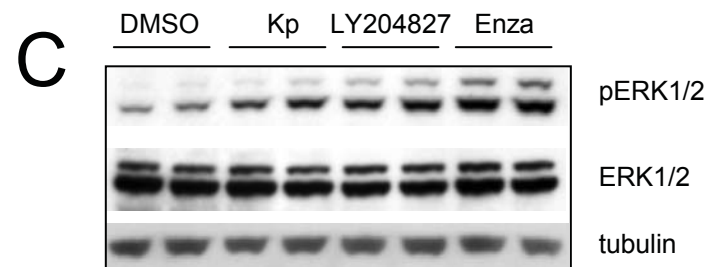

Kotliarova et al, Supp. Figure 7

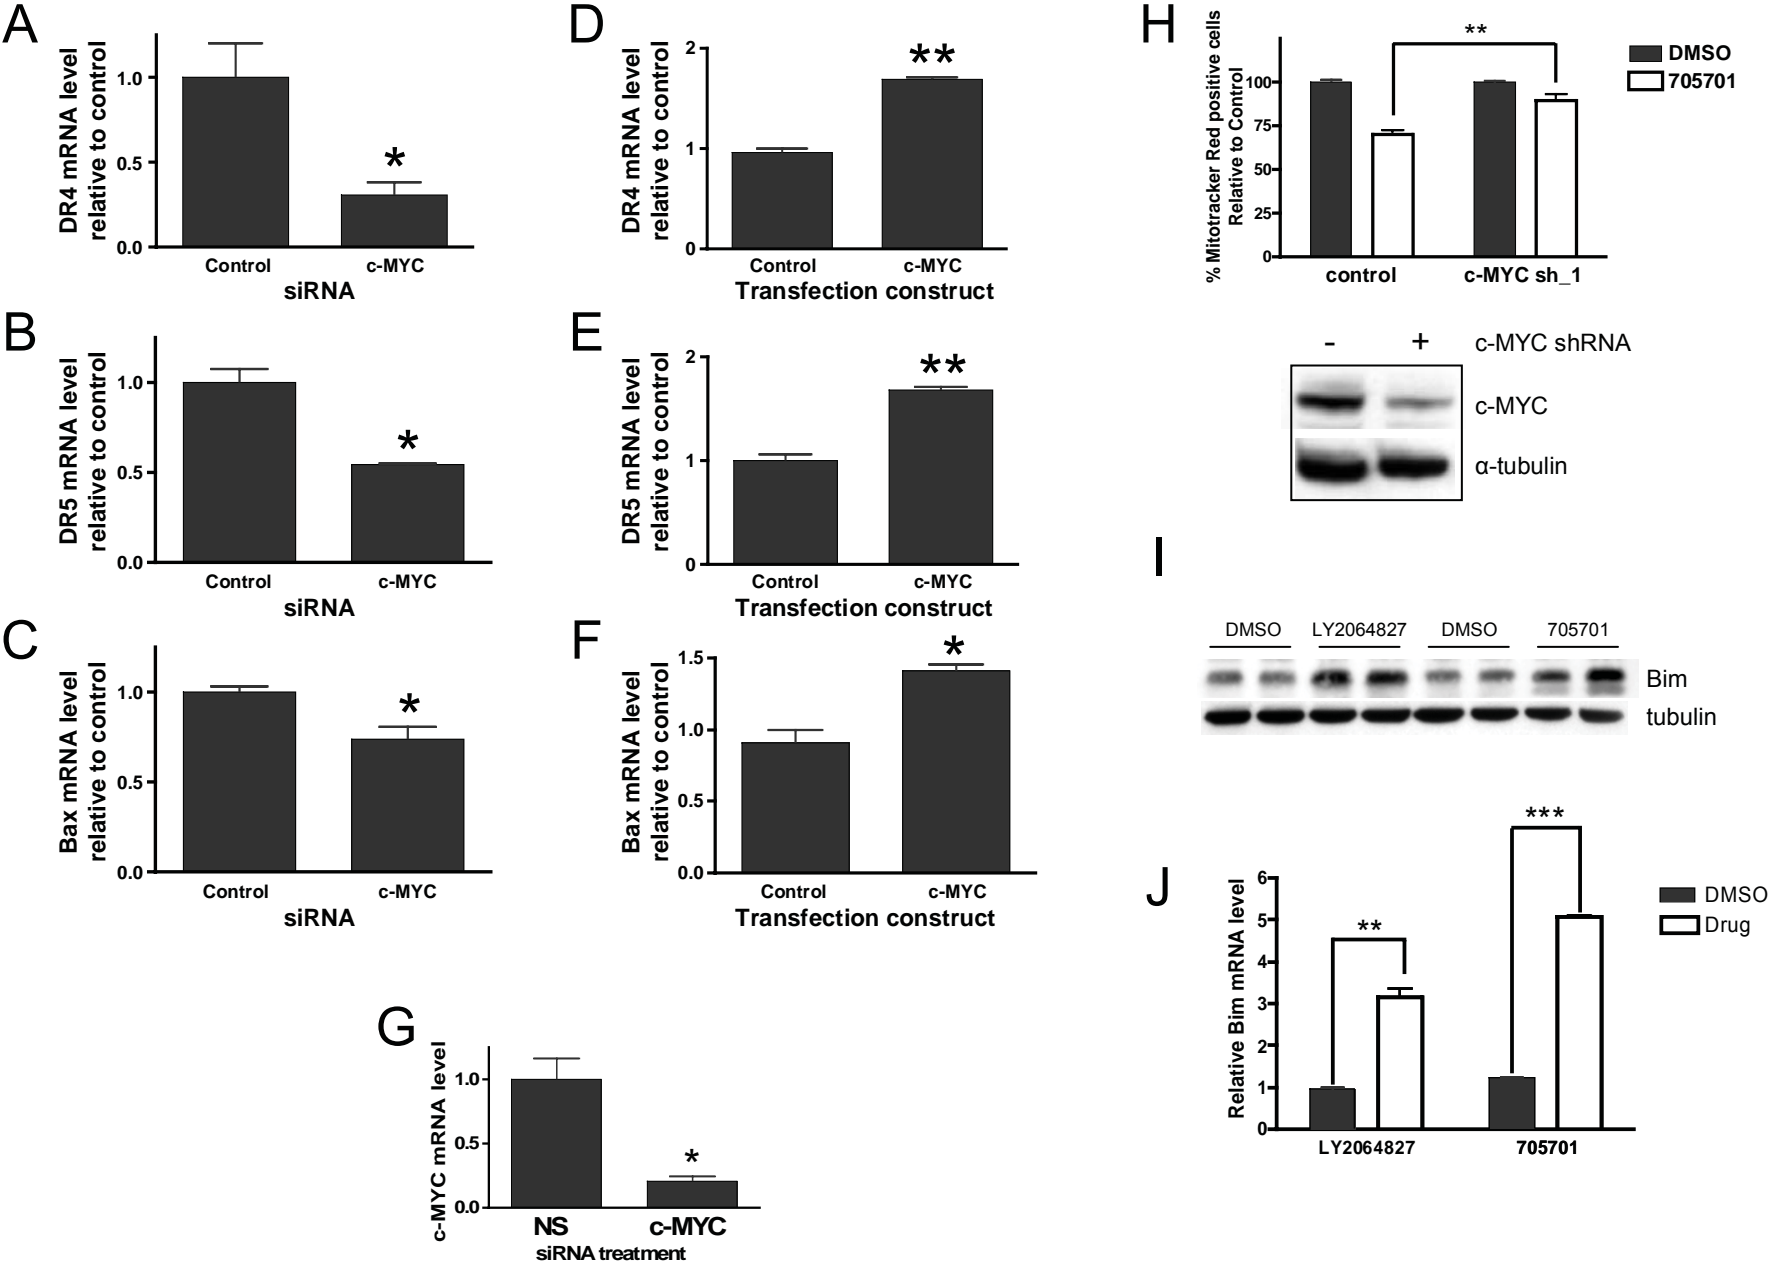

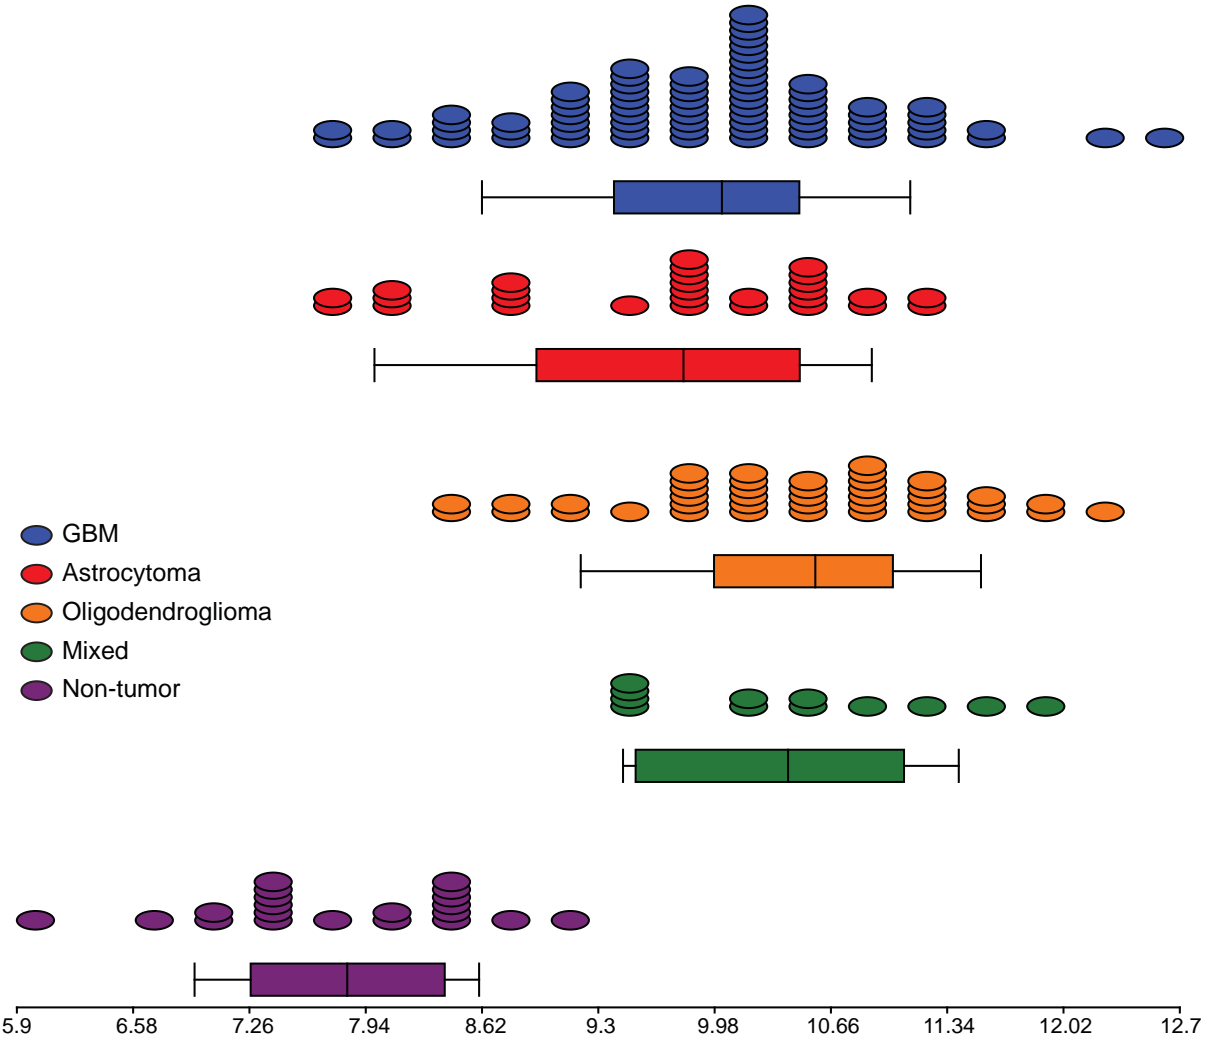



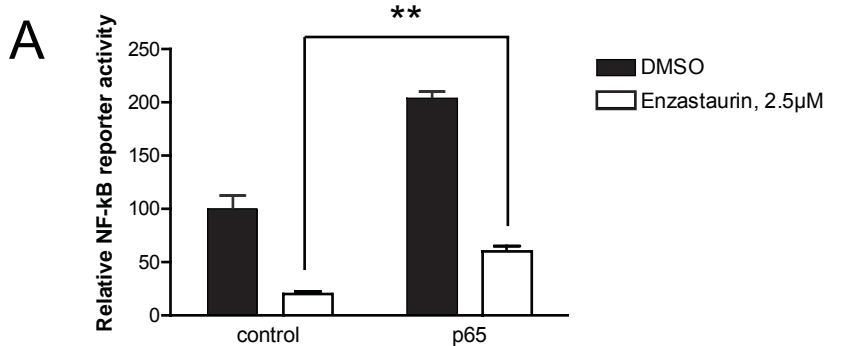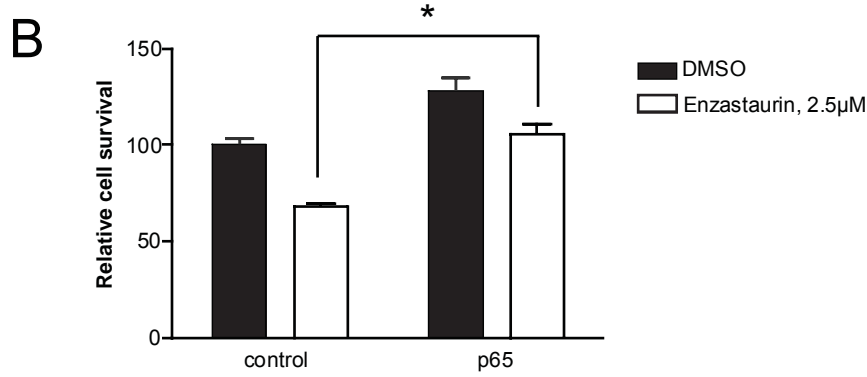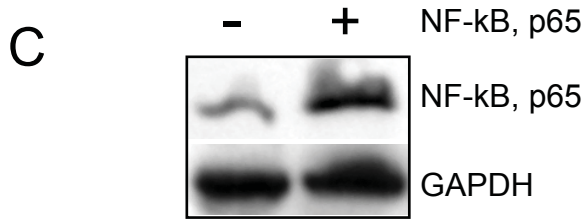

Kotliarova et al, Supp. Figure 10

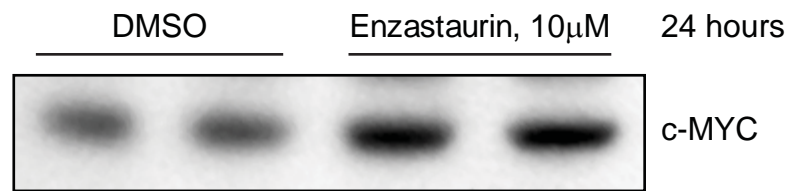

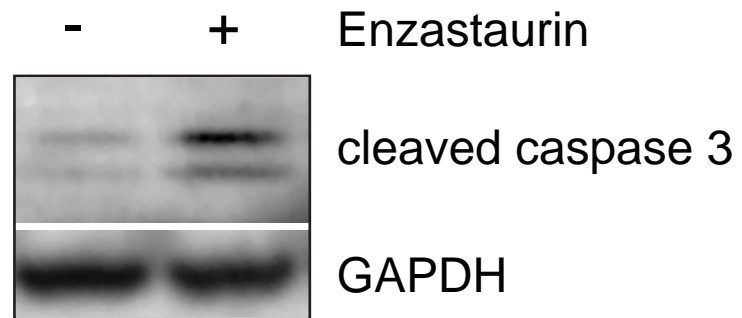

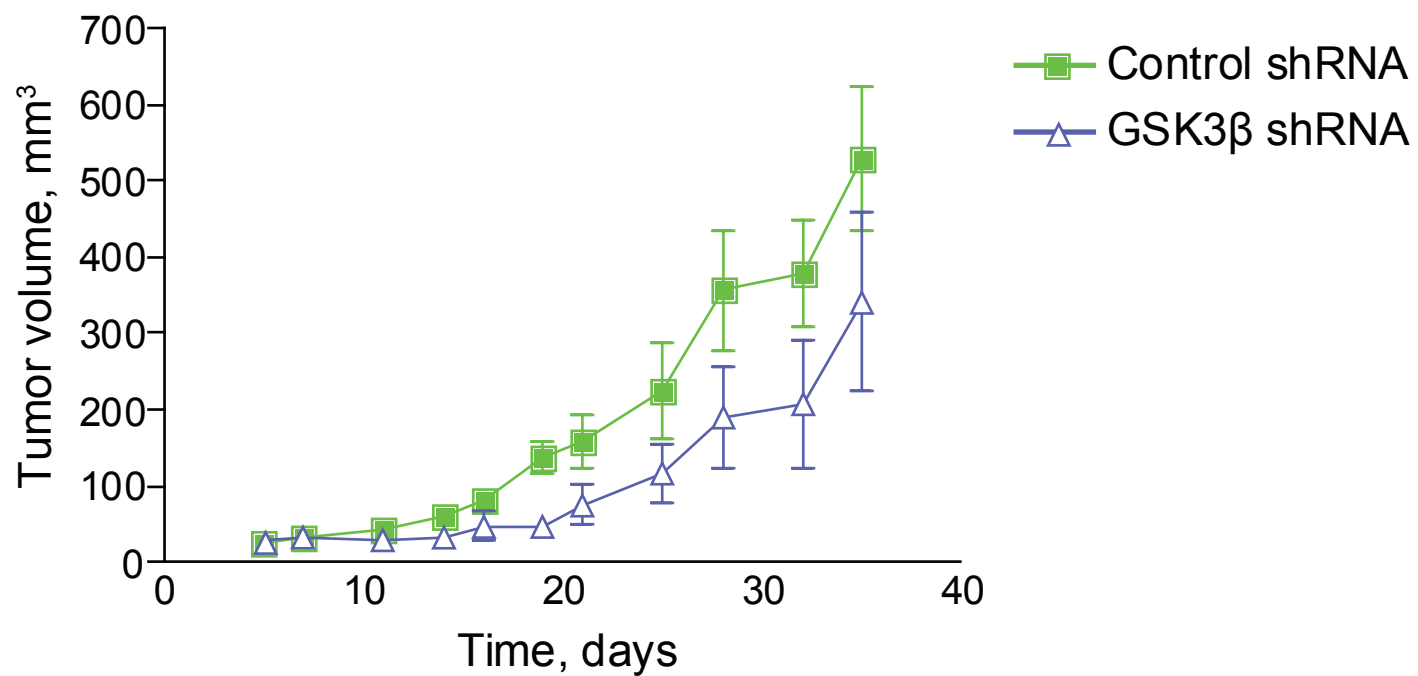

Supplement: NIHMS55761-supplement-Supplemental_F.pdf [file NIHMS55761-supplement-Supplemental_F.pdf]
